# Supplementary material for: A moist aquaplanet variant of the Held–Suarez test for atmospheric model dynamical cores
Source: Copernicus journal article supplement (doi:10.5194/gmd-9-1263-2016), 2016-04-04
Supplement: Supplementary file 1 [file gmd-9-1263-2016-supplement.zip]

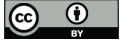

## *Supplement of*

# **A moist aquaplanet variant of the Held–Suarez test for atmospheric model dynamical cores**

**Diana R. Thatcher and Christiane Jablonowski**

*Correspondence to:* Diana R. Thatcher (dtatch@umich.edu)

- [gmd-9-1263-2016-supplement-title-page.pdf](#)
- [moist\\_idealized\\_test\\_case\\_MITC\\_physics.f90](#)

The copyright of individual parts of the supplement might differ from the CC-BY 3.0 licence.
